# Supplementary material for: Alternate pathway for standard SCR on Cu-zeolites with gas-phase ammonia
Source: Royal Society of Chemistry journal article supplement (doi:10.1039/d1re00041a), 2021-01-01
Supplement: d1re00041a1.pdf [file d1re00041a1.pdf]

## Supporting Information

for

### Alternate pathway for standard SCR on Cu-Zeolites with gas-phase ammonia

Rohil Daya<sup>1\*</sup>, Christopher J. Keturakis<sup>2</sup>, Dylan Trandal<sup>1</sup>, Ashok Kumar<sup>1</sup>, Saurabh Y. Joshi<sup>1</sup>, Aleksey Yezerets<sup>1</sup>

<sup>1</sup>*Cummins Inc., 1900 McKinley Ave, Columbus, IN 47201, U.S.A.*

<sup>2</sup>*Cummins Emission Solutions, 1801 US Highway 51/138, Stoughton, WI 53589, U.S.A*

E-mail : rohil.daya@cummins.com

# 1. Reaction Mechanism for Site-Specific SCR Model

The site-specific model utilized here builds upon our previous work on a 3-site NH<sub>3</sub> storage model to simulate NH<sub>3</sub> TPD (temperature programmed desorption) as a function of hydrothermal aging [1]. The model structure on Brønsted acid sites and Physisorbed sites is retained with similar rate parameters, while the lumped Copper sites are separated into Z<sub>2</sub>Cu and ZCuOH sites. Number densities of Z<sub>2</sub>Cu and ZCuOH sites are estimated through NO<sub>2</sub>-TPD and NO + NH<sub>3</sub> titration experiments, as reported in [2].

We consider up to 1 NH<sub>3</sub> adsorbed per ZCuOH site, and up to 2 NH<sub>3</sub> to adsorb per Z<sub>2</sub>Cu site, consistent with previous quantification of NH<sub>3</sub> adsorbed per Cu site at 200°C in 10% O<sub>2</sub> and 7% H<sub>2</sub>O [1, 3]. While DFT calculations and spectroscopic investigations suggest NH<sub>3</sub>/Cu ratios of 4 for Z<sub>2</sub>Cu sites, and 3 for ZCuOH sites [4-5], this level of NH<sub>3</sub> solvation is likely achieved at temperatures below 200°C. The additional NH<sub>3</sub> adsorption on Cu sites at low temperatures is lumped into the Physisorbed site, which also includes weakly bound NH<sub>3</sub> on Brønsted acid sites and Lewis acidic extra-framework aluminum sites. The desorption activation energies on isolated Cu sites are consistent with DFT estimations in [4]. More details on the identification of adsorption-desorption kinetics and surface coverages on each site are included in [1, 6].

Standard SCR is assumed to occur through the reaction of NO with NH<sub>3</sub>-solvated Cu species, consistent with the current state of understanding [7-8]. This is represented globally in the model through reactions R7 and R8 (Table S1). Rate parameters for these SCR reactions are estimated using kinetic regime experimental data on catalysts with different proportions of Z<sub>2</sub>Cu and ZCuOH sites. More details on this will be included in a future publication. The overall reaction mechanism is shown in Table S1.

**Table S1**  
Site-Specific NH<sub>3</sub> Storage and Standard SCR Reaction Mechanism on Cu-SSZ-13

| Reaction Number | Reaction                                                             | Rate Expression                                                                                                                                                                                           |
|-----------------|----------------------------------------------------------------------|-----------------------------------------------------------------------------------------------------------------------------------------------------------------------------------------------------------|
| R1              | $\text{NH}_3 + \text{ZH} \leftrightarrow \text{ZNH}_4$               | $r_{\text{AdsZH}} = k_{\text{AdsZH}} y_{\text{NH}_3,s} \theta_{\text{ZH}} \Omega_{\text{ZH}}$<br>$r_{\text{DesZH}} = k_{\text{DesZH}} \theta_{\text{ZNH}_4} \Omega_{\text{ZH}}$                           |
| R2              | $\text{NH}_3 + \text{ZNH}_4 \leftrightarrow \text{ZNH}_4\text{NH}_3$ | $r_{\text{AdsZNH}_4} = k_{\text{AdsZNH}_4} y_{\text{NH}_3,s} \theta_{\text{ZNH}_4} \Omega_{\text{ZH}}$<br>$r_{\text{DesZNH}_4} = k_{\text{DesZNH}_4} \theta_{\text{ZNH}_4\text{NH}_3} \Omega_{\text{ZH}}$ |
| R3              | $\text{NH}_3 + \text{P} \leftrightarrow \text{PNH}_3$                | $r_{\text{Adsp}} = k_{\text{Adsp}} y_{\text{NH}_3,s} \theta_{\text{P}} \Omega_{\text{P}}$<br>$r_{\text{Desp}} = k_{\text{Desp}} \theta_{\text{PNH}_3} \Omega_{\text{P}}$                                  |
| R4              | $\text{NH}_3 + \text{ZCuOH} \leftrightarrow \text{ZCuOHNH}_3$        | $r_{\text{AdsZCuOH}} = k_{\text{AdsZCuOH}} y_{\text{NH}_3,s} \theta_{\text{ZCuOH}} \Omega_{\text{ZCuOH}}$<br>$r_{\text{DesZCuOH}} = k_{\text{DesZCuOH}} \theta_{\text{ZCuOHNH}_3} \Omega_{\text{ZCuOH}}$  |

|    |                                                                                                                                      |                                                                                                                                                                                                                                                                                                                                      |
|----|--------------------------------------------------------------------------------------------------------------------------------------|--------------------------------------------------------------------------------------------------------------------------------------------------------------------------------------------------------------------------------------------------------------------------------------------------------------------------------------|
| R5 | $\text{NH}_3 + \text{Z}_2\text{Cu} \leftrightarrow \text{Z}_2\text{CuNH}_3$                                                          | $r_{\text{Ads}_{\text{Z}_2\text{Cu}}} = k_{\text{Ads}_{\text{Z}_2\text{Cu}}} y_{\text{NH}_3,s} \theta_{\text{Z}_2\text{Cu}} \Omega_{\text{Z}_2\text{Cu}}$ $r_{\text{Des}_{\text{Z}_2\text{Cu}}} = k_{\text{Des}_{\text{Z}_2\text{Cu}}} \theta_{\text{Z}_2\text{CuNH}_3} \Omega_{\text{Z}_2\text{Cu}}$                                |
| R6 | $\text{NH}_3 + \text{Z}_2\text{CuNH}_3 \leftrightarrow \text{Z}_2\text{Cu}(\text{NH}_3)_2$                                           | $r_{\text{Ads}_{\text{Z}_2\text{CuNH}_3}} = k_{\text{Ads}_{\text{Z}_2\text{CuNH}_3}} y_{\text{NH}_3,s} \theta_{\text{Z}_2\text{CuNH}_3} \Omega_{\text{Z}_2\text{Cu}}$ $r_{\text{Des}_{\text{Z}_2\text{CuNH}_3}} = k_{\text{Des}_{\text{Z}_2\text{CuNH}_3}} \theta_{\text{Z}_2\text{Cu}(\text{NH}_3)_2} \Omega_{\text{Z}_2\text{Cu}}$ |
| R7 | $4\text{ZCuOHNH}_3 + 4\text{NO} + \text{O}_2 \rightarrow 4\text{ZCuOH} + 4\text{N}_2 + 6\text{H}_2\text{O}$                          | $r_{\text{SSCR}_{\text{ZCuOH}}} = k_{\text{SSCR}_{\text{ZCuOH}}} y_{\text{NO},s}^{0.8} y_{\text{O}_2,s}^{0.3} \theta_{\text{ZCuOHNH}_3} \Omega_{\text{ZCuOH}}$                                                                                                                                                                       |
| R8 | $2\text{Z}_2\text{Cu}(\text{NH}_3)_2 + 4\text{NO} + \text{O}_2 \rightarrow 2\text{Z}_2\text{Cu} + 4\text{N}_2 + 6\text{H}_2\text{O}$ | $r_{\text{SSCR}_{\text{Z}_2\text{Cu}}} = k_{\text{SSCR}_{\text{Z}_2\text{Cu}}} y_{\text{NO},s}^{0.8} y_{\text{O}_2,s}^{0.3} \theta_{\text{Z}_2\text{Cu}(\text{NH}_3)_2} \Omega_{\text{Z}_2\text{Cu}}$                                                                                                                                |

## 2. Dynamic NO<sub>x</sub> Conversion as a function of Temperature and NO Feed

Figure S1 shows the initial change in the NO<sub>x</sub> conversion vs. NH<sub>3</sub> storage for 200 ppm and 1000 ppm feed NO from 175°C-250°C. The contribution of the initial increase in NO<sub>x</sub> conversion to the overall steady-state conversion appears to increase with increasing feed and decreasing temperatures

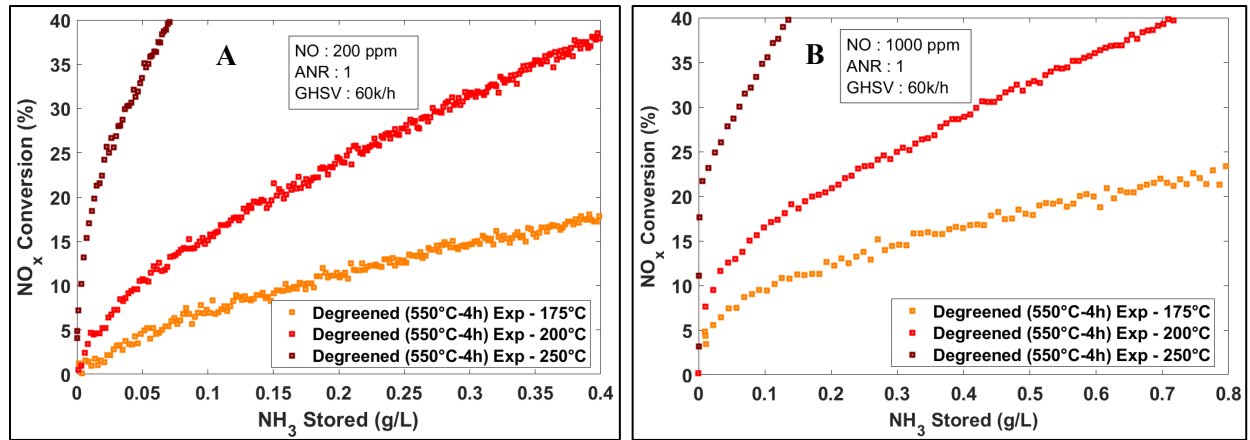

**Figure S1.** Initial NO<sub>x</sub> Conversion as a function of NH<sub>3</sub> storage and catalyst temperature under standard SCR conditions (NO<sub>2</sub>/NO<sub>x</sub> = 0) at 60k/h GHSV and ANR 1 with **A.** Feed NO : 200 ppm and **B.** Feed NO : 1000 ppm

## 3. Site-Specific Model for Reduction of Cu<sup>2+</sup> Sites

### 3.1 Reaction Mechanism

To model the reduction half cycle of the standard SCR reaction, we utilized the same NH<sub>3</sub> storage model framework shown in Table S1. We included the interaction of NO with NH<sub>3</sub> solvated Cu sites to generate reduced Cu sites, and the subsequent NH<sub>3</sub> solvation of the reduced Cu sites. Activation energies for the reduction of ZCuOH and Z<sub>2</sub>Cu sites were set to 71 kJ/mol and 74 kJ/mol respectively, as reported from

theoretical calculations in [4]. Reaction pre-exponentials are estimated from NO + NH<sub>3</sub> titration experiments on catalysts with different proportions of Z<sub>2</sub>Cu and ZCuOH sites. More details on this will be included in a future publication. Following the reduction of Cu sites and subsequent NH<sub>3</sub> solvation, a temperature programmed desorption (TPD) experiment was run to desorb the NH<sub>3</sub> from reduced Cu and Bronsted acid sites (similar protocol to NH<sub>3</sub>-TPD on oxidized catalysts). This information was utilized to estimate the adsorption-desorption kinetics for the reduced Cu sites. More details on the identification of these kinetics and surface coverages on each site are included in [6]. The overall reaction mechanism is shown in Table S2.

**Table S2**  
Reaction Mechanism for Reduction of ZCuOH and Z<sub>2</sub>Cu Sites on Cu-SSZ-13

| Reaction Number | Reaction                                                                                                                   | Rate Expression                                                                                                                                                                                                         |
|-----------------|----------------------------------------------------------------------------------------------------------------------------|-------------------------------------------------------------------------------------------------------------------------------------------------------------------------------------------------------------------------|
| R7              | $\text{ZCuOHNH}_3 + \text{NO} \rightarrow \text{ZCu} + \text{N}_2 + 2\text{H}_2\text{O}$                                   | $r_{\text{RHCZCuOH}} = k_{\text{RHCZCuOH}} y_{\text{NO},s} \theta_{\text{ZCuOHNH}_3} \Omega_{\text{ZCuOH}}$                                                                                                             |
| R8              | $\text{Z}_2\text{CuNH}_3 + \text{NO} \rightarrow \text{ZCu} + \text{ZH} + \text{N}_2 + \text{H}_2\text{O}$                 | $r_{\text{RHCZ}_2\text{Cu}} = k_{\text{RHCZ}_2\text{Cu}} y_{\text{NO},s} \theta_{\text{Z}_2\text{CuNH}_3} \Omega_{\text{Z}_2\text{Cu}}$                                                                                 |
| R9              | $\text{Z}_2\text{Cu}(\text{NH}_3)_2 + \text{NO} \rightarrow \text{ZCuNH}_3 + \text{ZH} + \text{N}_2 + 2\text{H}_2\text{O}$ | $r_{\text{RHCZ}_2\text{Cu}} = k_{\text{RHCZ}_2\text{Cu}} y_{\text{NO},s} \theta_{\text{Z}_2\text{Cu}(\text{NH}_3)_2} \Omega_{\text{Z}_2\text{Cu}}$                                                                      |
| R10             | $\text{NH}_3 + \text{ZCu} \leftrightarrow \text{ZCuNH}_3$                                                                  | $r_{\text{AdSZCu}} = k_{\text{AdSZCu}} y_{\text{NH}_3,s} \theta_{\text{ZCu}} \Omega_{\text{ZCu}}$<br>$r_{\text{DesZCu}} = k_{\text{DesZCu}} \theta_{\text{ZCuNH}_3} \Omega_{\text{ZCu}}$                                |
| R11             | $\text{NH}_3 + \text{ZCuNH}_3 \leftrightarrow \text{ZCu}(\text{NH}_3)_2$                                                   | $r_{\text{AdSZCuNH}_3} = k_{\text{AdSZCuNH}_3} y_{\text{NH}_3,s} \theta_{\text{ZCuNH}_3} \Omega_{\text{ZCu}}$<br>$r_{\text{DesZCuNH}_3} = k_{\text{DesZCuNH}_3} \theta_{\text{ZCu}(\text{NH}_3)_2} \Omega_{\text{ZCu}}$ |

### 3.2 Results

Figure S2 compares the NO consumption experimental data against the model predictions. While the model reasonably predicts the overall qualitative NO consumption rates, the initial NO consumption is significantly underpredicted. This is associated with the requirement for NH<sub>3</sub> solvation of Z<sub>2</sub>Cu and ZCuOH sites prior to reduction, inconsistent with observed experimental data.

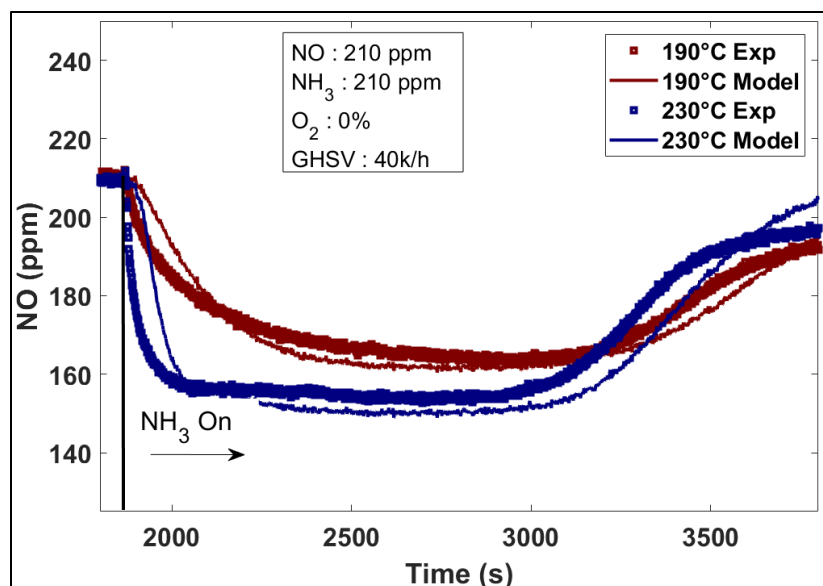

**Figure S2.** NO Consumption during NO + NH<sub>3</sub> titration of Cu<sup>2+</sup> sites. Squares represent experimental data and lines represents model results (190°C in dark red, 230°C in dark blue)

#### 4. Influence of SCR reaction with gas-phase NH<sub>3</sub> on Dynamic NO<sub>x</sub> Conversion at 200°C and 175°C

Figure S3 plots the complete dynamic NO<sub>x</sub> conversion curve at 200°C and 175°C, comparing the two kinetic models with experimental data. The influence of the SCR reaction with gas-phase NH<sub>3</sub> is primarily observed at low NH<sub>3</sub> coverage and the addition of this reaction in the kinetic model leads to accurate representation of the experimental data.

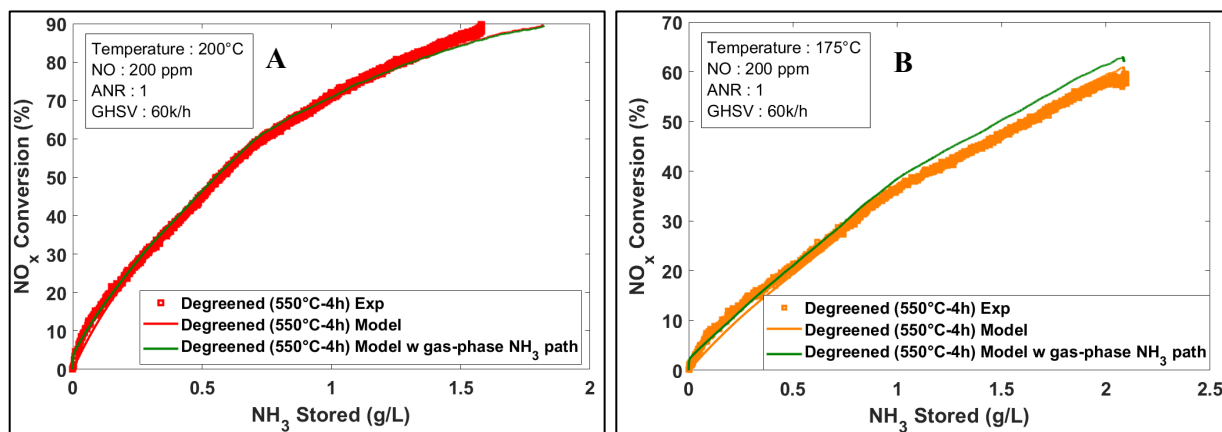

**Figure S3.** NO<sub>x</sub> Conversion as a function of NH<sub>3</sub> storage under standard SCR conditions at **A.** 200°C and **B.** 175°C.

Squares represent experimental data and lines represent model results

## 5. Standard SCR Reaction Order in NH<sub>3</sub>

### 5.1 Analytical Expression

In general, the NH<sub>3</sub> reaction order for standard SCR can be estimated as:

$$O_{\text{NH}_3} = y_{\text{NH}_3,s} \frac{\partial \ln(r_{\text{sscr}})}{\partial y_{\text{NH}_3,s}} \quad (1)$$

Utilizing the rate expressions for standard SCR with adsorbed-NH<sub>3</sub> and gas-phase NH<sub>3</sub> (Table 1 in main manuscript), we can write the overall SCR rate as:

$$r_{\text{sscr}} = k_{\text{sscr1}} y_{\text{NO},s} y_{\text{O}_2}^{0.32} \theta_{\text{NH}_3\text{S1}} \Omega_1 + \frac{k_{\text{sscr2}} y_{\text{NO}} y_{\text{O}_2}^{0.32} y_{\text{NH}_3,s} \Omega_1}{1 + K_{\text{inh}} y_{\text{NH}_3,s}} \quad (2)$$

The definition of steady state can be used to express the NH<sub>3</sub> surface coverage as a function of the NO and NH<sub>3</sub> surface mole fractions, as shown in equation (4).

$$\frac{\partial \theta_{\text{NH}_3\text{S1}}}{\partial t} = k_{\text{Ads}} y_{\text{NH}_3,s} (1 - \theta_{\text{NH}_3\text{S1}}) - (k_{\text{Des1}} + k_{\text{Des2}}) \theta_{\text{NH}_3\text{S1}} - k_{\text{sscr1}} y_{\text{NO},s} y_{\text{O}_2}^{0.32} \theta_{\text{NH}_3\text{S1}} = 0 \quad (3)$$

$$\Rightarrow \theta_{\text{NH}_3\text{S1}} = \frac{k_{\text{Ads}} y_{\text{NH}_3,s}}{k_{\text{Ads}} y_{\text{NH}_3,s} + (k_{\text{Des1}} + k_{\text{Des2}}) + k_{\text{sscr1}} y_{\text{NO},s} y_{\text{O}_2}^{0.32}} \quad (4)$$

Using the result from equation (4) in equation (2), we have:

$$r_{\text{sscr}} = \frac{k_{\text{sscr1}} y_{\text{NO},s} y_{\text{O}_2}^{0.32} k_{\text{Ads}} y_{\text{NH}_3,s} \Omega_1}{k_{\text{Ads}} y_{\text{NH}_3,s} + (k_{\text{Des1}} + k_{\text{Des2}}) + k_{\text{sscr1}} y_{\text{NO},s} y_{\text{O}_2}^{0.32}} + \frac{k_{\text{sscr2}} y_{\text{NO}} y_{\text{O}_2}^{0.32} y_{\text{NH}_3,s} \Omega_1}{1 + K_{\text{inh}} y_{\text{NH}_3,s}} \quad (5)$$

Multiplying both sides of equation (5) by the natural logarithm, we obtain the following result:

$$\begin{aligned} \ln r_{\text{sscr}} = & \ln(k_{\text{sscr1}} y_{\text{O}_2}^{0.32} \Omega_1) + \ln y_{\text{NO},s} + \ln(k_{\text{Ads}} y_{\text{NH}_3,s}) - \ln(k_{\text{Ads}} y_{\text{NH}_3,s} + (k_{\text{Des1}} + k_{\text{Des2}}) + \\ & k_{\text{sscr1}} y_{\text{NO},s} y_{\text{O}_2}^{0.32}) + \ln(k_{\text{sscr2}} y_{\text{O}_2}^{0.32} \Omega_1) + \ln y_{\text{NO},s} + \ln y_{\text{NH}_3,s} - \ln(1 + K_{\text{inh}} y_{\text{NH}_3,s}) \end{aligned} \quad (6)$$

Differentiating equation (6) in  $y_{\text{NH}_3,s}$  and using the result in equation (1) leads to the following expression for NH<sub>3</sub> reaction order

$$\begin{aligned} O_{\text{NH}_3} = y_{\text{NH}_3,s} \frac{\partial \ln(r_{\text{sscr}})}{\partial y_{\text{NH}_3,s}} = & y_{\text{NH}_3,s} \left( \frac{1}{y_{\text{NO},s}} \frac{\partial y_{\text{NO},s}}{\partial y_{\text{NH}_3,s}} + \frac{1}{y_{\text{NH}_3,s}} - \frac{k_{\text{Ads}} + \frac{\partial(k_{\text{Des1}} + k_{\text{Des2}})}{\partial y_{\text{NH}_3,s}} + k_{\text{sscr1}} y_{\text{O}_2}^{0.32} \frac{\partial y_{\text{NO},s}}{\partial y_{\text{NH}_3,s}}}{k_{\text{Ads}} y_{\text{NH}_3,s} + (k_{\text{Des1}} + k_{\text{Des2}}) + k_{\text{sscr1}} y_{\text{NO},s} y_{\text{O}_2}^{0.32}} + \right. \\ & \left. \frac{1}{y_{\text{NO},s}} \frac{\partial y_{\text{NO},s}}{\partial y_{\text{NH}_3,s}} + \frac{1}{y_{\text{NH}_3,s}} - \frac{K_{\text{inh}}}{(1 + K_{\text{inh}} y_{\text{NH}_3,s})} \right) \end{aligned} \quad (7)$$

$$\Rightarrow \theta_{\text{NH}_3} = 2 + 2 \frac{y_{\text{NH}_3,s}}{y_{\text{NO},s}} \frac{\partial y_{\text{NO},s}}{\partial y_{\text{NH}_3,s}} - \frac{y_{\text{NH}_3,s} (k_{\text{Ads}} + \frac{\partial(k_{\text{Des1}} + k_{\text{Des2}})}{\partial y_{\text{NH}_3,s}} + k_{\text{SScr1}} y_{\text{O}_2}^{0.32} \frac{\partial y_{\text{NO},s}}{\partial y_{\text{NH}_3,s}})}{k_{\text{Ads}} y_{\text{NH}_3,s} + (k_{\text{Des1}} + k_{\text{Des2}}) + k_{\text{SScr1}} y_{\text{NO},s} y_{\text{O}_2}^{0.32}} - \frac{K_{\text{inh}} y_{\text{NH}_3,s}}{(1 + K_{\text{inh}} y_{\text{NH}_3,s})} \quad (8)$$

### 5.2 NH<sub>3</sub> Coverage as a Function of NH<sub>3</sub> Surface Mole Fraction

The model estimated mean NH<sub>3</sub> coverage as a function of the NH<sub>3</sub> surface mole fraction is shown in Figure S4. A linear relationship is observed below an ANR of 0.7, as expected for Langmuir-type adsorption isotherms at low partial pressures.

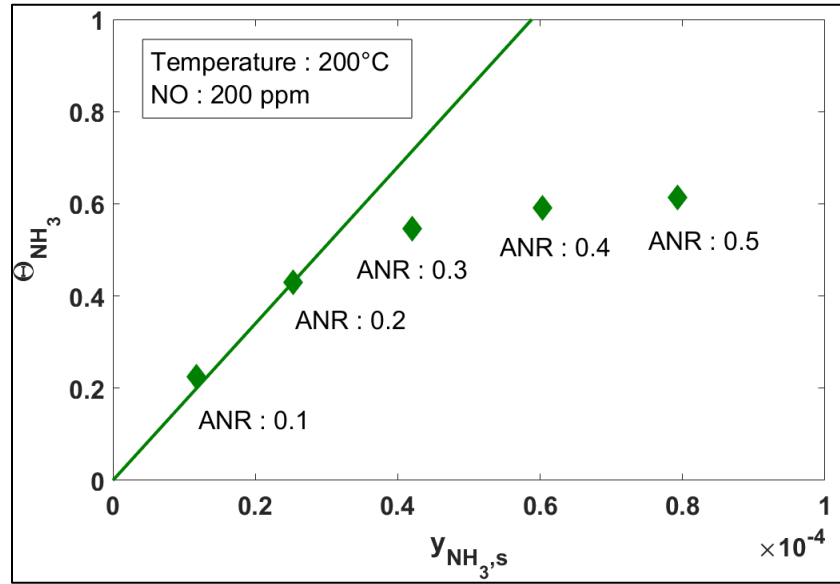

**Figure S4.** Mean NH<sub>3</sub> surface coverage as a function of NH<sub>3</sub> surface mole fraction. Green diamonds represent model results from ANR sweep at 200°C and solid line represents a linear regression fit

### 5.3 ANR Sweep Repeatability

ANR sweep experiments were conducted at 200°C to identify the SCR reaction order with NH<sub>3</sub>. Each ANR point was repeated three times to establish repeatability, and the results are summarized in Table S3. In general, NO<sub>x</sub> conversion and NH<sub>3</sub> storage values were repeatable at all ANRs included in the test, leading to minor deviations in estimated turnover rates and mean NH<sub>3</sub> surface coverages. Turnover rates (TORs) were calculated by normalizing the NO<sub>x</sub> consumption rate with the total reducible Cu sites quantified from NO + NH<sub>3</sub> titration experiments.

**Table S3**  
ANR Sweep Test Results at 200°C

| NO <sub>x</sub> Feed (ppm) | ANR  | NH <sub>3</sub> Feed (ppm) | NH <sub>3</sub> Conversion (%) | NO <sub>x</sub> Conversion (%) | NH <sub>3</sub> Storage (g/L) | Mean NH <sub>3</sub> Coverage | ln(Mean NH <sub>3</sub> Coverage) | NO <sub>x</sub> Flow (mol/s) | TOR (mol <sub>NO</sub> /mol <sub>Cu</sub> -s) | ln(TOR) |
|----------------------------|------|----------------------------|--------------------------------|--------------------------------|-------------------------------|-------------------------------|-----------------------------------|------------------------------|-----------------------------------------------|---------|
| 199.89                     | 0.33 | 66.37                      | 99.42                          | 33.92                          | 0.71                          | 0.25                          | -1.40                             | 8.53E-08                     | 1.04E-03                                      | -6.87   |
| 201.38                     | 0.33 | 66.82                      | 99.35                          | 33.17                          | 0.70                          | 0.24                          | -0.35                             | 8.59E-08                     | 1.02E-03                                      | -6.88   |
| 202.80                     | 0.33 | 67.07                      | 99.50                          | 33.66                          | 0.71                          | 0.24                          | -0.34                             | 8.65E-08                     | 1.05E-03                                      | -6.86   |
| 200.85                     | 0.28 | 56.26                      | 99.35                          | 28.52                          | 0.62                          | 0.21                          | -0.48                             | 8.57E-08                     | 8.79E-04                                      | -7.04   |
| 201.70                     | 0.28 | 56.43                      | 99.31                          | 28.78                          | 0.63                          | 0.22                          | -0.46                             | 8.61E-08                     | 8.90E-04                                      | -7.02   |
| 202.78                     | 0.28 | 56.62                      | 99.34                          | 29.14                          | 0.62                          | 0.21                          | -0.48                             | 8.65E-08                     | 9.06E-04                                      | -7.01   |
| 201.76                     | 0.23 | 45.60                      | 99.33                          | 23.25                          | 0.51                          | 0.17                          | -0.68                             | 8.61E-08                     | 7.20E-04                                      | -7.24   |
| 202.07                     | 0.23 | 45.96                      | 99.24                          | 23.44                          | 0.50                          | 0.17                          | -0.69                             | 8.62E-08                     | 7.27E-04                                      | -7.23   |
| 202.75                     | 0.23 | 46.10                      | 99.26                          | 23.26                          | 0.50                          | 0.17                          | -0.69                             | 8.65E-08                     | 7.24E-04                                      | -7.23   |
| 201.63                     | 0.17 | 35.14                      | 99.20                          | 18.24                          | 0.43                          | 0.15                          | -0.83                             | 8.60E-08                     | 5.64E-04                                      | -7.48   |
| 202.47                     | 0.17 | 35.29                      | 98.96                          | 18.34                          | 0.40                          | 0.14                          | -0.92                             | 8.64E-08                     | 5.70E-04                                      | -7.47   |
| 202.51                     | 0.17 | 35.25                      | 99.07                          | 18.10                          | 0.42                          | 0.14                          | -0.87                             | 8.64E-08                     | 5.62E-04                                      | -7.48   |
| 200.70                     | 0.12 | 24.53                      | 98.90                          | 12.63                          | 0.30                          | 0.10                          | -1.21                             | 8.56E-08                     | 3.89E-04                                      | -7.85   |
| 202.16                     | 0.12 | 24.54                      | 98.81                          | 12.59                          | 0.32                          | 0.11                          | -1.15                             | 8.63E-08                     | 3.90E-04                                      | -7.85   |
| 202.55                     | 0.12 | 24.81                      | 98.90                          | 12.71                          | 0.32                          | 0.11                          | -1.14                             | 8.64E-08                     | 3.95E-04                                      | -7.84   |

## References

- [1] Daya R, Joshi SY, Luo J, Dadi RK, Currier NW, Yezerets A. On kinetic modeling of change in active sites upon hydrothermal aging of Cu-SSZ-13. *Applied Catalysis B: Environmental*. 2020 Apr 1;263:118368.
- [2] Villamaina R, Liu S, Nova I, Tronconi E, Ruggeri MP, Collier J, York A, Thompsett D. Speciation of Cu cations in Cu-CHA catalysts for NH<sub>3</sub>-SCR: effects of SiO<sub>2</sub>/AlO<sub>3</sub> ratio and Cu-loading investigated by transient response methods. *ACS Catalysis*. 2019 Aug 20;9(10):8916-27.
- [3] Luo J, Gao F, Kamasamudram K, Currier N, Peden CH, Yezerets A. New insights into Cu/SSZ-13 SCR catalyst acidity. Part I: Nature of acidic sites probed by NH<sub>3</sub> titration. *Journal of Catalysis*. 2017 Apr 1;348:291-9.
- [4] Paolucci C, Parekh AA, Khurana I, Di Iorio JR, Li H, Albarracin Caballero JD, Shih AJ, Anggara T, Delgass WN, Miller JT, Ribeiro FH. Catalysis in a cage: condition-dependent speciation and dynamics of exchanged Cu cations in SSZ-13 zeolites. *Journal of the American Chemical Society*. 2016 May 11;138(18):6028-48.
- [5] Borfecchia E, Negri C, Lomachenko KA, Lamberti C, Janssens TV, Berlier G. Temperature-dependent dynamics of NH<sub>3</sub>-derived Cu species in the Cu-CHA SCR catalyst. *Reaction Chemistry & Engineering*. 2019;4(6):1067-80.
- [6] Daya, R., Trandal, D., Dadi, R. K., Tang, Y., Li, H., Joshi, S.Y., Luo, J., Kumar, A., & Yezerets, A. (2021). Kinetics and thermodynamics of NH<sub>3</sub> solvation on Z<sub>2</sub>Cu, ZCuOH and ZCu sites in Cu-SSZ-13 – Implications for hydrothermal aging. *Applied Catalysis B*, submitted.
- [7] Paolucci C, Di Iorio JR, Ribeiro FH, Gounder R, Schneider WF. Catalysis science of NO<sub>x</sub> selective catalytic reduction with ammonia over Cu-SSZ-13 and Cu-SAPO-34. *Advances in Catalysis*. 2016 Jan 1;59:1-07.
- [8] Gao F, Peden CH. Recent progress in atomic-level understanding of Cu/SSZ-13 selective catalytic reduction catalysts. *Catalysts*. 2018 Apr;8(4):140.
